# Supplementary material
Source: PubMed Central journal article supplement (PMC3957854)
Supplement: AAC.02022-13_zac003142648so1.pdf [file AAC.02022-13_zac003142648so1.pdf]

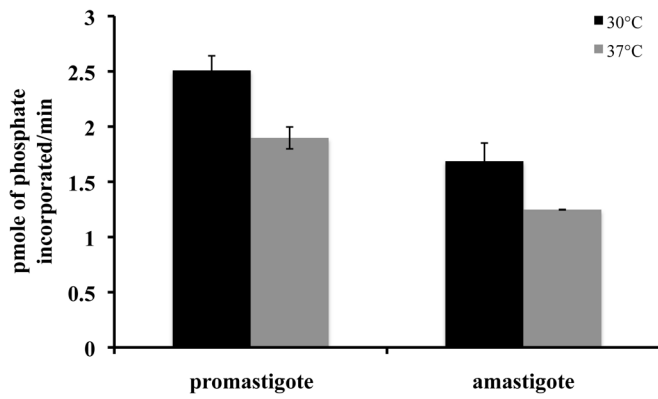

**FIGURE S1. Transgenic CK1.2 is sensitive to high temperature.**

A. Kinase assay using 27  $\mu$ M of CK-S and 10  $\mu$ l of V5-coated beads purified from transgenic promastigote or amastigote expressing either pLEXSY (mock) or pLEXSY-CK1.2 at 30 or 37°C. The reactions, spotted on a p81 paper, were measured using a scintillation counter.

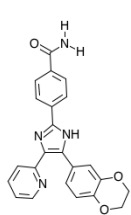

D4476

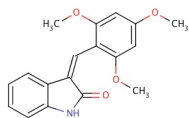

IC261

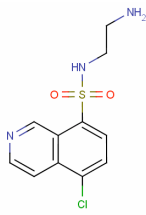

CKI-7

**FIGURE S2. Structure of D4476, IC261 and CKI-7.**

The structures were obtained from PubChem (<http://pubchem.ncbi.nlm.nih.gov/>).

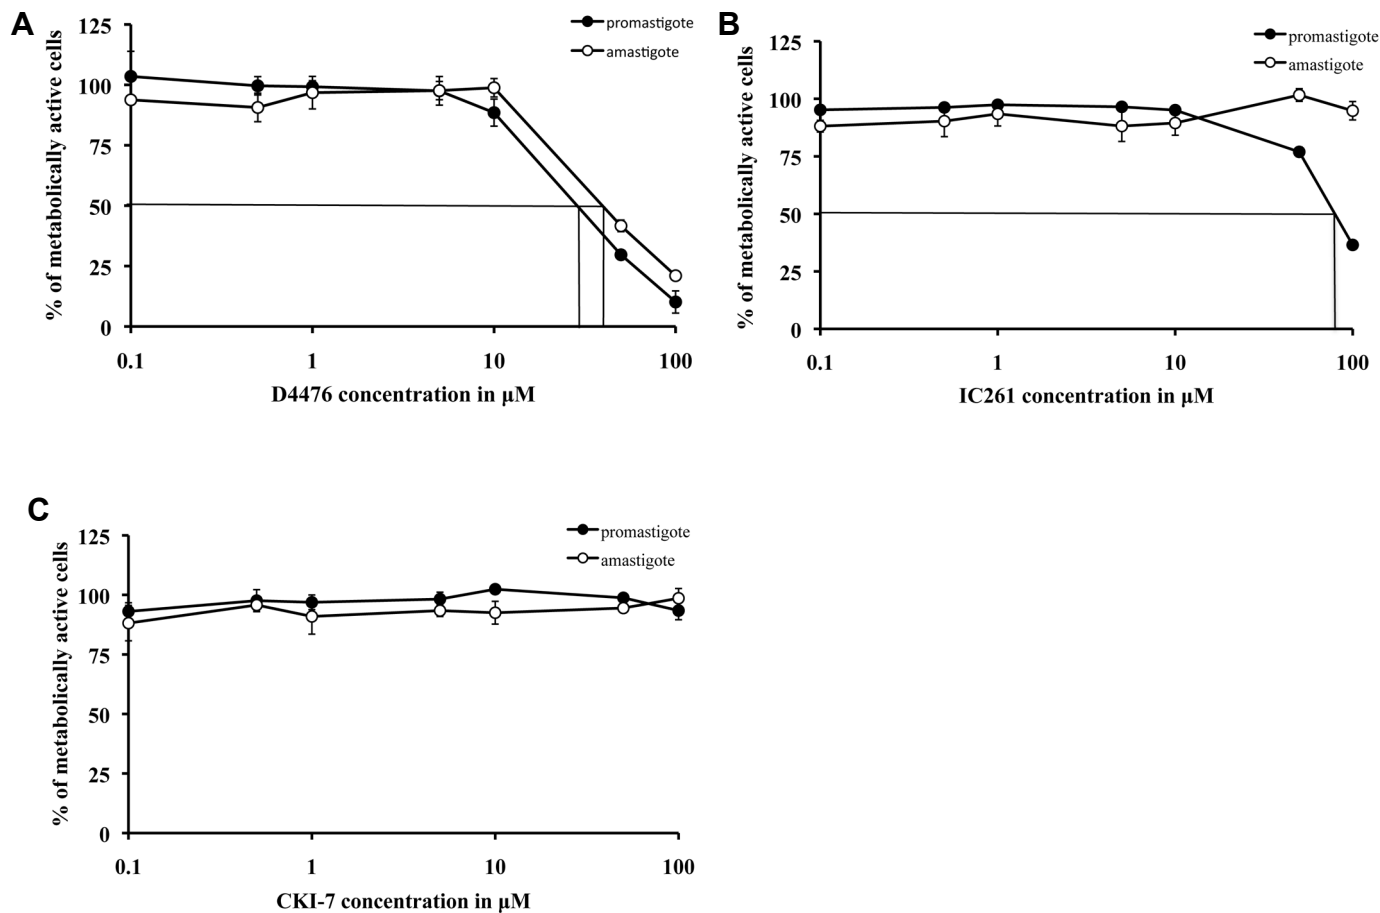

**FIGURE S3. Determination of the EC<sub>50</sub> of D4476, IC261 and CKI-7 on promastigotes and axenic amastigotes.**

Promastigotes or axenic amastigotes in their corresponding medium were mixed with an equal volume of medium containing the inhibitor at the indicated concentrations in 1% DMSO. After 24h incubation in the dark at 26°C (promastigotes) or 37°C (amastigotes), resazurin was added and the plates were incubated for an additional 24h in the dark at the appropriate temperature and read by a fluorescent microplate reader. A, D4476; B, IC261; C, CKI- 7.
